# Supplementary material for: Enhanced Development of Azoxymethane-Induced Colonic Preneoplastic Lesions in Hypertensive Rats
Source: PubMed Central journal article supplement (PMC3742268; doi:10.3390/ijms140714700), 2013-07-15
Supplement: ijms-14-14700-s001.pdf [file ijms-14-14700-s001.pdf]

## Supplementary Information

**Table S1.** Primers sequences.

| <b>Target gene</b> | <b>Direction</b> | <b>Primer sequence (5'-3')</b> |
|--------------------|------------------|--------------------------------|
| TNF- $\alpha$      | forward          | AACACACGAGACGCTGAAGT           |
|                    | reverse          | TCCAGTGAGTTCCGAAAGCC           |
| MCP-1              | forward          | TGGGCCTGTTGTTACAGTT            |
|                    | reverse          | ACCTGCTGCTGGTGATTCTC           |
| iNOS               | forward          | GTGGTGACAAGCACATTTGG           |
|                    | reverse          | GGCTGGACTTTTCACTCTGC           |
| GPx                | forward          | TCCACCGTGTATGCCTTCTCC          |
|                    | reverse          | CCTGCTGTATCTGCGCACTGGA         |
| CAT                | forward          | GAGGCAGTGTACTGCAAGTTCC         |
|                    | reverse          | GGGACAGTTCACAGGTATCTGC         |
| GAPDH              | forward          | CCTTCATTGACCTCAACTACATGGT      |
|                    | reverse          | TCATTGTCATACCAGGAAATGAGCT      |

© 2013 by the authors; licensee MDPI, Basel, Switzerland. This article is an open access article distributed under the terms and conditions of the Creative Commons Attribution license (<http://creativecommons.org/licenses/by/3.0/>).
